# Supplementary material
Source: publisher figshare collection journal article supplement (https://gsapubs.figshare.com/articles/dataset/_/20247399)
Supplement: Supplementary file 1 [file 1]

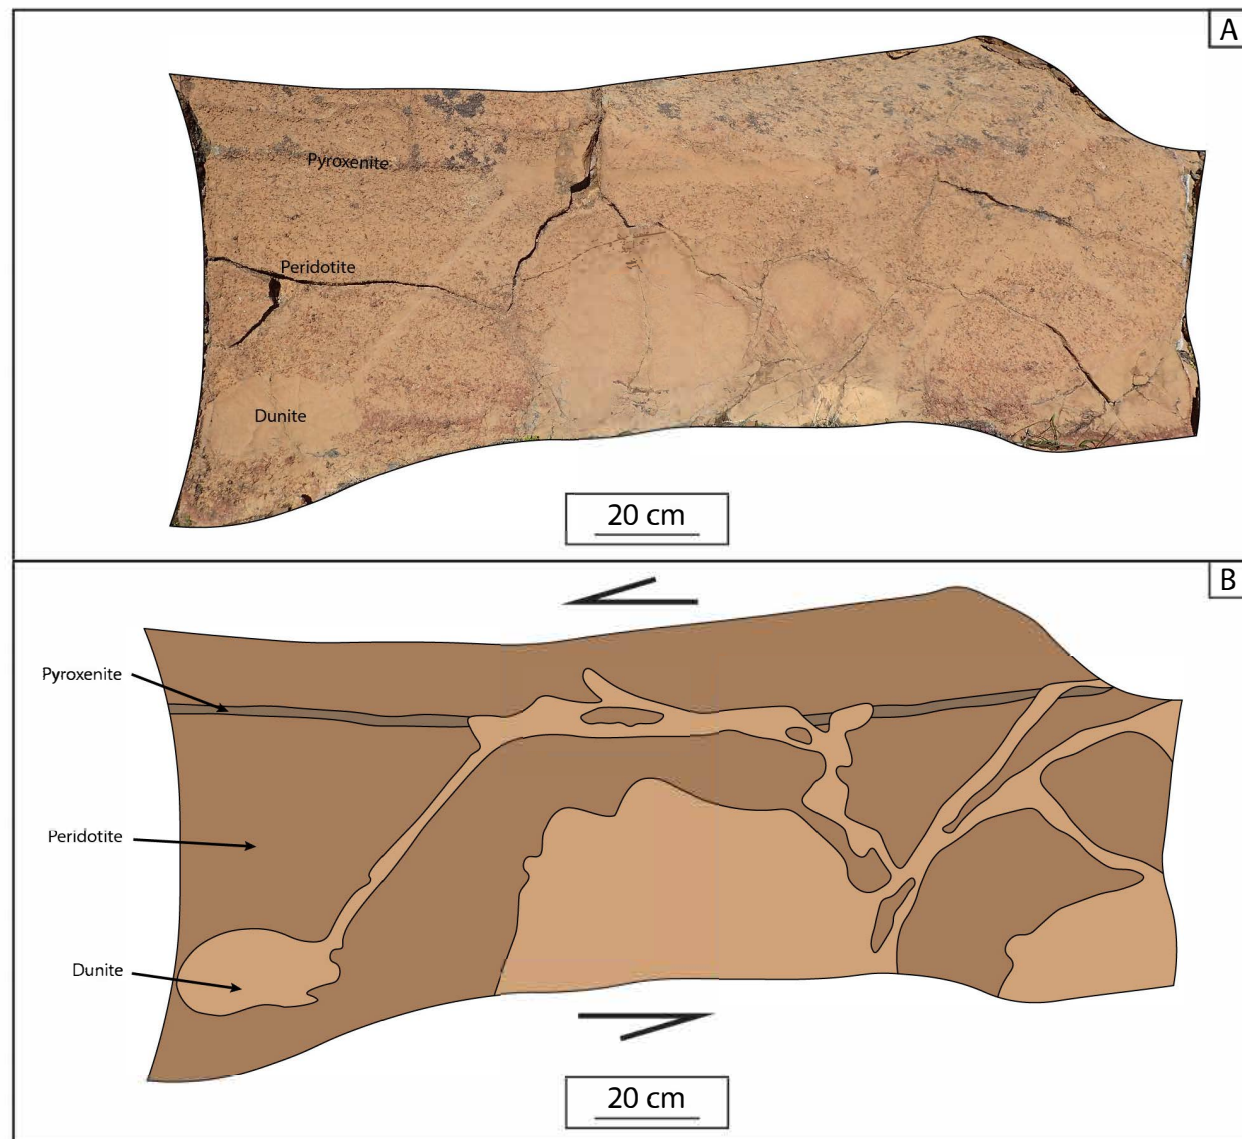

Figure S1. (A) Larger view of the outcrop “site 1” presented in Figure 2. The background and foreground that do not belong to the same plane have been cropped out. (B) Interpretative drawing depicting the spatial distribution of the different lithologies in Vicky Bluff. The inferred shear sense is also presented.
