# Supplementary material
Source: publisher figshare collection journal article supplement (https://gsapubs.figshare.com/articles/dataset/_/20247399)
Supplement: Supplementary file 1 [file 1]

## Sheet: Samples coordinates WGS84
Sample	Lithology	Latitude °N	Longitude °W	Altitude (m)
14T02A	Dunite	41.3606	122.563	2067
14T08A	Dunite	41.3429	122.574	2201
14T08B	Cpx-Harzburgite	41.3429	122.574	2201
14T09A	Dunite	41.3424	122.576	2234
14T09B	Cpx-Harzburgite	41.3424	122.576	2234
14T10A	Dunite	41.3429	122.576	2210
14T10B	Cpx-Harzburgite	41.3429	122.576	2210
14T10C	Cpx-Harzburgite	41.3429	122.576	2210
14T11A	Dunite	41.3457	122.576	2121
14T11B	Dunite	41.3457	122.576	2121
14T11C	Harzburgite	41.3457	122.576	2121
14T11D	Cpx-Harzburgite	41.3457	122.576	2121
14T11E	Pyroxenite	41.3457	122.576	2121
14T11F	Pyroxenite	41.3457	122.576	2121
14T12	Dunite	41.3434	122.547	1905
14T13	Cpx-Dunite	41.3434	122.546	1910
14T14	Dunite	41.3433	122.546	1916
14T15A	Dunite	41.3436	122.546	1922
14T15B	Harzburgite	41.3436	122.546	1922
14T16A	Cpx-Dunite	41.3438	122.546	1929
14T16B	Cpx-Harzburgite	41.3438	122.546	1929
14T17	Plg-Lherzolite	41.3438	122.546	1934
14T18	Cpx-Dunite	41.3438	122.546	1939
14T19	Dunite	41.3439	122.546	1945
14T20A	Dunite	41.3439	122.546	1949
14T20B	Cpx-Harzburgite	41.3439	122.546	1949
14T21A	Dunite	41.3439	122.546	1951
14T21B	Cpx-Harzburgite	41.3439	122.546	1951
14T22	Dunite	41.344	122.546	1954
14T23A	Dunite	41.3439	122.546	1961
14T23B	Cpx-Harzburgite	41.3439	122.546	1961
14T24A	Dunite	41.344	122.546	1966
14T24B	Cpx-Harzburgite	41.344	122.546	1966
14T25A	Cpx-Harzburgite	41.344	122.546	1973
14T25B	Cpx-Harzburgite	41.344	122.546	1973
14T26	Cpx-Harzburgite	41.3441	122.545	1983
14T27A	Dunite	41.3441	122.546	1993
14T27B	Cpx-Harzburgite	41.3441	122.546	1993
14T28A	Dunite	41.3441	122.545	2003
14T28B	Cpx-Harzburgite	41.3441	122.545	2003
14T28C	Serpentinite	41.3441	122.545	2003
14T29	Dunite	41.3441	122.545	2010
14T30	Dunite	41.3441	122.545	2016
14T31A	Dunite	41.344	122.545	2021
14T31B	Cpx-Harzburgite	41.344	122.545	2021
14T32A	Harzburgite	41.344	122.545	2025
14T32B	Cpx-Harzburgite	41.344	122.545	2025
14T33	Dunite	41.344	122.544	2032
14T34	Dunite	41.344	122.544	2042
14T35	Dunite	41.344	122.544	2049
14T36	Dunite	41.344	122.544	2054
14T37	Dunite	41.344	122.544	2060
14T38	Dunite	41.344	122.544	2065
14T39	Dunite	41.3441	122.544	2070
14T40	Dunite	41.3441	122.544	2075
14T41	Dunite	41.3442	122.544	2080
14T42A	Dunite	41.3442	122.544	2085
14T42B	Cpx-Harzburgite	41.3442	122.544	2085
14T43A	Harzburgite	41.3444	122.544	2091
14T43B	Cpx-Harzburgite	41.3444	122.544	2091
14T44A	Dunite	41.3447	122.543	2102
14T44B	Harzburgite	41.3447	122.543	2102
14T45	Harzburgite	41.3448	122.543	2115
14T46A	Cpx-Harzburgite	41.3451	122.543	2125
14T46B	Cpx-Harzburgite	41.3451	122.543	2125
14T47A	Dunite	41.3453	122.542	2139
14T47B	Cpx-Harzburgite	41.3453	122.542	2139

## Sheet: Chromite-Avg
Sample	Na2O	Al2O3	SiO2	K2O	CaO	MnO	FeO	MgO	TiO2	Cr2O3	NiO	ZnO	V2O3	XCr
14T02A	0.01	27.3325	0.5025	0.0035	0.01	0.203	17.0695	14.525	0.2445	38.0775	0.1365	0.125556	0.213333	48.3825
14T08A	0.0111111	25.77	0.0177778	0.00111111	0.00111111	0.235556	18.1	13.2089	0.227778	40.6256	0.137778	0.133333	0.214444	51.4122
14T08B	0	30.9784	0.0155714	0	0	0.209762	17.7467	13.7731	0.148524	35.4159	0.159524	0.203095	0.23	43.4285
14T09A	0.00714286	21.7971	0.00857143	0.00142857	0.00857143	0.255714	20.0357	11.8371	0.3	43.9071	0.11	0.165714	0.254286	57.4726
14T09B	0	22.4194	0.0215714	0	0	0.265857	19.5777	11.7653	0.257857	44.2059	0.102714	0.194571	0.253643	56.9537
14T10A	0	16.1844	0.0291111	0	0	0.307	22.2422	10.3088	0.272778	49.2377	0.0957778	0.167111	0.258556	67.119
14T10B	0	26.6762	0.0405	0	0	0.241687	20.4849	11.8598	0.331688	38.1549	0.142875	0.275	0.293813	49.0026
14T11A	0.00333333	20.135	0.0283333	0.00333333	0.00833333	0.283333	19.175	12.0667	0.285	46.5117	0.09	0.148333	0.251667	60.7873
14T11B	0	18.755	0.03	0.0116667	0.00666667	0.273333	22.1617	11.0783	0.238333	45.6133	0.0833333	0.171667	0.278333	44.3705
14T11C	0	18.905	0.04	0.005	0	0.275	20.875	10.965	0.17	46.305	0.095	0.2	0.24	44.3346
14T11D	0.0116667	30.9267	0.035	0	0.00833333	0.216667	17.4583	13.8867	0.196667	35.2167	0.141667	0.198	0.21	42.6978
14T11E	0.026	22.084	0.03	0	0.026	0.264	20.282	11.438	0.238	43.66	0.104	0.194	0.284	43.839
14T12	0.0118	10.319	0.01	0.0066	0.0124	0.4452	29.0338	6.2096	0.3822	52.5962	0.1018	0.1808	0.2956	78.2948
14T13	0.0108	19.9678	0.0272	0.0048	0.0272	0.271	19.7458	12.3522	0.2962	46.7824	0.124	0.1296	0.2434	61.1235
14T14	0.014	19.3996	0.0315714	0.00228571	0	0.246286	20.8334	11.509	0.295	46.8636	0.105429	0.132286	0.241286	61.8476
14T15A	0.0111429	13.0613	0.00942857	0.0117143	0.00242857	0.306714	23.3254	9.67486	0.285143	52.7071	0.0808571	0.148429	0.301143	73.0267
14T15B	0.00657143	14.4009	0.0121429	0.00271429	0.0118571	0.340429	24.0676	9.28157	0.254714	51.0206	0.0945714	0.180571	0.306571	70.3945
14T16A	0.00575	27.8652	0.0035	0.00075	0.00225	0.22525	18.4133	13.756	0.2445	39.2505	0.1555	0.17925	0.19675	48.5938
14T16B	0.00416667	29.1083	0.0155	0.000666667	0.00433333	0.205167	18.2023	13.6327	0.157833	38.1802	0.1575	0.166667	0.193667	46.8183
14T17	0.01875	30.1082	0.042	0.0075	0.00675	0.21825	16.7203	14.0915	0.17575	37.9815	0.13175	0.19725	0.2165	45.8405
14T18	0.0078	25.769	0.028	0.006	0.0142	0.2196	19.7796	13.7928	0.262	39.498	0.1446	0.1432	0.2008	50.7082
14T19	0.0074	26.8408	0.0252	0.0096	0.0028	0.2216	19.698	13.3416	0.2896	38.7486	0.1252	0.1696	0.2282	49.2078
14T20A	0.0145	28.0812	0.00875	0.005	0.01175	0.2395	20.6675	13.117	0.21	36.6535	0.1405	0.197	0.21725	46.689
14T20B	0.004	36.76	0.0144	0.0068	0.003	0.1768	16.0678	15.2346	0.091	31.3596	0.1894	0.228	0.178	36.4103
14T21A	0.0082	27.3616	0.02	0.008	0.0072	0.2248	19.2132	13.9248	0.2592	38.2238	0.1138	0.187	0.1898	48.386
14T21B	0.013	29.384	0.03125	0.0065	0.00125	0.20625	16.3413	14.372	0.20275	39.4842	0.151	0.1725	0.221	47.4199
14T22	0.0154286	13.5557	0.0251429	0.0107143	0.00914286	0.321429	20.8556	10.2817	0.308286	54.3213	0.0714286	0.193571	0.276286	72.8889
14T23A	0.00733333	10.5917	0.023	0.00333333	0.00466667	0.353	25.7037	8.72667	0.293333	53.4723	0.0876667	0.163333	0.296	77.2089
14T23B	0.0127143	30.2021	0.007	0.00157143	0.00728571	0.188143	17.6229	13.9564	0.163	37.1934	0.158571	0.197286	0.214571	45.2507
14T24A	0.0042	14.1824	0.0186	0.001	0.006	0.3312	25.1194	9.3814	0.4736	49.7816	0.0852	0.1506	0.316	70.1894
14T24B	0.00366667	31.706	0.033	0.0146667	0.003	0.249	18.0757	14.1443	0.151333	35.42	0.133667	0.197	0.188667	42.8468
14T25A	0.0183333	30.5002	0.023	0.0015	0.0105	0.182167	17.9547	14.3803	0.236833	36.247	0.160333	0.194	0.221167	44.3698
14T25B	0.0058	32.9096	0.0072	0	0.0054	0.1918	16.3998	14.991	0.1912	34.4844	0.1628	0.214	0.2292	41.2958
14T26	0.00744444	29.8527	0.0165556	0.00377778	0.00877778	0.193667	16.6927	14.4341	0.195556	38.0609	0.158111	0.177667	0.202889	46.1219
14T27A	0.002	28.7086	0.0284	0.0182	0.0166	0.2018	17.3254	14.4972	0.2226	39.0986	0.1524	0.1334	0.2014	47.7524
14T27B	0.00981818	23.7803	0.122364	0.00636364	0.072	0.226182	17.7556	13.3469	0.231273	44.3929	0.146909	0.119909	0.200636	55.6536
14T28A	0.0188333	28.1848	0.0305	0.00233333	0.0163333	0.253333	19.3078	13.9228	0.286	37.9345	0.131667	0.185	0.2348	47.4752
14T28B	0.00875	32.9255	0.0125	0	0.0065	0.1925	16.6418	14.7955	0.21125	34.4735	0.17825	0.192	0.18575	41.2743
14T28C	0.00475	26.5252	0.03675	0.01375	0.00775	0.198	17.6475	13.516	0.44125	40.4588	0.12575	0.21975	0.27425	50.5809
14T29	0.0143333	12.525	0.0216667	0.0103333	0.0146667	0.3355	22.5015	9.9085	0.315833	54.1455	0.0568333	0.1625	0.2855	74.3639
14T30	0.0109167	11.3931	0.0229167	0.00145833	0.00666667	0.311	22.8607	9.68887	0.313333	54.9998	0.0714583	0.166292	0.30075	76.41
14T31A	0.00514286	11.7487	0.0152857	0.0218571	0.00528571	0.302143	21.2776	10.1426	0.277857	56.8334	0.0712857	0.14	0.27325	76.4491
14T31B	0.00985714	26.0214	0.0254286	0.001	0.00928571	0.257143	17.3607	12.9824	0.192429	42.6236	0.106857	0.212	0.232143	52.4108
14T32A	0.00635	18.9177	0.0238	0.00975	0.0056	0.2704	19.2692	11.6883	0.2782	49.944	0.07725	0.14905	0.2427	63.9229
14T32B	0.018	26.7593	0.015	0	0	0.321	22.3613	10.1717	0.159333	39.9343	0.0443333	0.366	0.195333	50.0675
14T33	0.0118333	11.5	0.0188333	0.000666667	0.0116667	0.348167	24.7015	8.613	0.318167	54.1192	0.0578333	0.165	0.284333	75.9506
14T35	0.0094	10.9916	0.0166	0	0.0056	0.2926	22.761	9.8226	0.3244	55.4722	0.0722	0.1386	0.3086	77.202
14T36	0.0194	11.2996	0.0248	0.0006	0.0002	0.365	22.904	9.4026	0.3016	55.5792	0.0546	0.1892	0.2934	76.7474
14T37	0.0131818	11.0215	0.0288182	0.00981818	0.00509091	0.318273	22.1363	9.58482	0.310636	56.4988	0.0849091	0.169273	0.301545	77.4773
14T38	0.00833333	11.022	0.0311667	0.008	0.0138333	0.3365	22.1432	9.53833	0.3025	56.8637	0.0741667	0.175667	0.267	77.5873
14T39	0.008	10.6777	0.0341429	0.00657143	0.00885714	0.315714	22.1921	9.821	0.283571	56.6343	0.0782857	0.0997143	0.277286	78.0653
14T40	0.0131667	10.3202	0.0148333	0.00983333	0.0035	0.300667	21.9922	9.912	0.269667	57.2015	0.0843333	0.0988333	0.286333	78.8106
14T41	0.0085	11.9732	0.0141667	0.00383333	0.00733333	0.295833	21.0722	10.629	0.294833	55.8852	0.0928333	0.1505	0.249833	75.7971
14T42A	0.005	10.5055	0.02275	0.009625	0.019875	0.319375	22.7469	9.91037	0.272875	56.352	0.073875	0.125625	0.234375	78.258
14T42B	0.01125	23.9434	0.030625	0.01725	0.0095	0.238375	18.385	12.6357	0.139	44.2945	0.10275	0.184125	0.179	55.3998
14T43A	0.0155	23.4517	0.0133333	0.007	0.013	0.266667	19.722	11.8963	0.0588333	44.7407	0.112833	0.189833	0.256667	56.146
14T43B	0.0135	35.2185	0.02525	0.00225	0.02225	0.18125	15.6468	15.108	0.0635	32.8637	0.165	0.16025	0.17975	38.5183
14T44A	0.013	9.982	0.00275	0.00875	0.01375	0.32975	25.5938	9.23675	0.23225	54.0433	0.1175	0.14625	0.2395	78.416
14T44B	0.0118333	28.6143	0.00766667	0.0161667	0.00816667	0.201667	17.133	13.8733	0.0938333	39.6437	0.144667	0.1945	0.169167	48.1785
14T45	0.007	30.3147	0.0238333	0.00233333	0.0135	0.184833	15.9008	14.5205	0.0705	38.9467	0.1515	0.1005	0.112333	46.3112
14T46A	0.0236667	18.9447	0.0263333	0.00366667	0.00333333	0.292333	19.317	11.5147	0.124667	49.7543	0.0743333	0.170333	0.252667	63.8049
14T46B	0.0018	29.5196	0.018	0.01	0.0016	0.2032	17.8412	13.4618	0.0442	38.6102	0.123	0.237	0.1862	46.7437
14T47A	0.00275	11.2897	0.01625	0.005	0.00675	0.29425	22.5065	10.0535	0.245	56.0568	0.06675	0.10525	0.289	76.9154
14T47B	0.00990909	31.2676	0.0244545	0.0154545	0.00509091	0.232182	16.1602	14.3004	0.0443636	37.6165	0.125727	0.272	0.132273	44.8286

## Sheet: Olivine-Avg
Sample	Na2O	Al2O3	SiO2	K2O	CaO	MnO	FeO	MgO	TiO2	Cr2O3	NiO	Fo
14T02A	0.008	0.012	41.828	0	0.12	0.144	8.828	50.006	0	0.006	0.336	90.9899
14T08A	0.00857143	0.00142857	41.4514	0.00142857	0.0771429	0.135714	8.79571	50	0	0.00571429	0.372857	91.019
14T08B	0.005	0.00657143	40.382	0.00214286	0.023	0.146857	9.08643	49.7211	0.00128571	0.0375714	0.426286	90.7033
14T09A	0	0.00333333	41.3717	0.00333333	0.0583333	0.143333	9.3	49.5617	0.00166667	0.0383333	0.365	90.4772
14T09B	0.0045	0.0112	40.3287	0.0021	0.0365	0.1663	9.4699	49.5499	0	0.0033	0.3643	90.3181
14T10A	0.00458824	0.0104706	40.7555	0.00588235	0.0436471	0.158353	9.26218	49.5184	0.000941176	0.00864706	0.366176	90.504
14T10B	0.00638462	0.00830769	40.7391	0.004	0.0344615	0.163769	10.2633	49.0017	0.00153846	0.006	0.384846	89.4868
14T11A	0.0133333	0.0116667	41.7883	0.0216667	0.0616667	0.138333	9.025	49.7767	0	0.00666667	0.353333	90.7691
14T11D	0	0.01	40.835	0.0025	0.0325	0.13	9.59	48.8725	0.0025	0.01	0.385	90.0854
14T11E	0.002	0.005	40.544	0.002	0.029	0.161	9.85	48.874	0	0.01	0.336	89.8443
14T11F	0.004	0.002	39.996	0.002	0.038	0.152	10.574	48.156	0	0.012	0.29	89.0342
14T12	0.00583333	0.012	41.2666	0.0126667	0.0125	0.15975	9.19508	48.7874	0	0.00833333	0.3645	90.4393
14T13	0.00333333	0.004	41.4378	0.00733333	0.1	0.135667	8.58883	49.291	0.0025	0.00516667	0.331667	91.0968
14T14	0.000571429	0.00471429	41.6767	0.0114286	0.058	0.136571	8.81629	49.112	0	0.00428571	0.370714	90.8525
14T15A	0.0082	0.0067	41.0566	0.0116	0.0533	0.1318	9.1659	48.7489	0.0019	0.0088	0.3828	90.4602
14T15B	0.00142857	0.00542857	41.0987	0.00128571	0.0201429	0.162571	9.35186	49.1514	0.00885714	0.00357143	0.403571	90.3566
14T16A	0.00633333	0.011	40.6325	0.00266667	0.0468333	0.144667	9.22567	49.6368	0.001	0.00933333	0.378333	90.5592
14T16B	0.00833333	0.0103333	41.0238	0.0035	0.0138333	0.1355	9.08167	49.047	0	0.00516667	0.409833	90.5916
14T17	0.00775	0.01625	41.0023	0.00575	0.02475	0.15475	8.95975	49.2168	0.0025	0.003	0.38675	90.7344
14T18	0.0032	0.0158	40.7862	0.0122	0.0784	0.133	8.8476	49.7532	0.0008	0.006	0.3816	90.9306
14T19	0.00485714	0.01	41.4753	0.00542857	0.102	0.113143	8.92386	49.2194	0	0.00285714	0.364429	90.7696
14T20A	0.00266667	0.0163333	40.988	0.0103333	0.0486667	0.133333	9.0355	48.997	0	0.0035	0.383667	90.6262
14T20B	0.01075	0.0015	41.21	0.003	0.02675	0.1185	8.992	48.7945	0	0.00325	0.40475	90.6323
14T21A	0.134667	0.0166667	41.5843	0.0401667	0.0993333	0.121167	8.75417	49.2252	0	0.0055	0.3555	90.9302
14T21B	0.003	0.0196667	41.036	0.015	0.036	0.147667	8.86967	50.0637	0	0.009	0.330667	90.961
14T22	0.01275	0.01875	41.2824	0.01575	0.05325	0.1605	9.12513	48.6505	0	0.00925	0.36075	90.4809
14T23A	0.0158	0.0148	41.6772	0.006	0.0836	0.1056	8.7796	49.035	0	0.007	0.349	90.8738
14T23B	0.0024	0.0078	41.1748	0.0012	0.0284	0.16	9.2542	49.2168	0.0324	0.0082	0.3888	90.4597
14T24A	0.00983333	0.00916667	40.8868	0.001	0.0513333	0.154	9.75017	48.6332	0.00833333	0.0055	0.324667	89.8922
14T24B	0.0062	0.011	40.6926	0.0116	0.0474	0.1152	9.1	49.7164	0	0.009	0.386	90.6894
14T25A	0	0.01	40.852	0.00266667	0.047	0.172	8.81167	49.7883	0.0206667	0.00633333	0.376667	90.9705
14T25B	0.0082	0.0096	41.2008	0.0016	0.0246	0.2002	9.1254	49.4904	0	0.0094	0.3694	90.6278
14T26	0.0082	0.012	41.896	0.0136	0.0492	0.1316	8.632	49.0564	0	0.0074	0.3642	91.0171
14T27A	0.0116	0.0134	41.2114	0.0112	0.0502	0.1404	8.6486	50.1054	0.0002	0.0056	0.365	91.1732
14T27B	0.00477778	0.00911111	40.7589	0.0112222	0.0137778	0.139667	8.90244	50.1226	0.00166667	0.00522222	0.393444	90.9403
14T28A	0.00275	0.00725	41.619	0.011	0.04425	0.14275	8.5335	50.086	0	0.00975	0.37925	91.2772
14T28B	0.000333333	0.005	41.236	0.002	0.0176667	0.123667	8.77533	49.5317	0	0.00866667	0.385	90.9614
14T29	0.0064	0.0154	41.0234	0.0132	0.0738	0.1254	8.8158	49.6982	0.0026	0.0028	0.359	90.951
14T30	0.00183333	0.012	40.993	0.00466667	0.092	0.0863333	8.99167	49.3228	0.0286667	0.004	0.352667	90.7237
14T31A	0.0074	0.0022	41.279	0.0078	0.0804	0.1316	8.61	49.8912	0	0.006	0.385	91.1747
14T31B	0.005375	0.00075	41.087	0	0.039375	0.13275	8.86325	49.898	0.029125	0.005875	0.394625	90.9412
14T32A	0.00575	0.02475	41.6543	0.00175	0.036	0.1325	8.7965	49.7193	0	0.00725	0.36875	90.9724
14T32B	0.0076	0.0062	40.7173	0.0172	0.0324	0.1365	8.7838	49.845	0.0005	0.004	0.3941	91.0049
14T33	0.00233333	0.01	41.3835	0.00166667	0.0715	0.1285	8.90933	49.454	0.0223333	0.00216667	0.3335	90.8227
14T34	0.00633333	0.02	41.5808	0.0025	0.079	0.1485	9.00983	49.4993	0.00433333	0.00666667	0.304	90.7364
14T35	0.0114	0.0206	41.1574	0.0012	0.0782	0.177	9.0502	49.1184	0.0122	0.0064	0.332	90.6335
14T36	0.0134	0.0214	41.4458	0	0.0886	0.1478	9.0836	49.3558	0.0318	0.0106	0.373	90.643
14T37	0.0014	0.0044	41.449	0.008	0.0866	0.1112	8.735	50.2314	0.0022	0.011	0.3794	91.1121
14T38	0.00875	0	41.188	0.00175	0.094	0.1295	8.69075	49.2297	0.00125	0.009	0.33425	90.99
14T39	0.002	0.0066	41.518	0.0118	0.0994	0.1434	8.6942	48.8234	0.0028	0.01	0.3346	90.919
14T40	0.0082	0.0124	41.6006	0.0052	0.0992	0.1118	8.7964	49.0564	0.0048	0.0064	0.3584	90.8609
14T41	0.0102	0.0126	41.1322	0.004	0.128	0.134	8.7354	49.303	0.0024	0.006	0.3118	90.9599
14T42A	0.008875	0.01475	41.5975	0.009	0.060625	0.14975	8.69437	49.1897	0.006375	0.00575	0.33975	90.9803
14T42B	0.0102	0.0086	41.2488	0.0062	0.0248	0.1314	8.4314	49.376	0.0072	0.0076	0.3948	91.2594
14T43A	0	0.00825	41.6508	0.00475	0.0235	0.102	8.415	49.4265	0.00375	0.00725	0.408	91.2824
14T43B	0.0055	0.0075	42.045	0.003	0.01675	0.147	8.40825	49.5802	0.00975	0.00725	0.375	91.3144
14T44A	0.00125	0.0165	41.7673	0.01275	0.06175	0.1645	8.7965	49.3897	0.00575	0.01075	0.35475	90.9178
14T44B	0.0034	0.004	41.8618	0.0064	0.0266	0.125	8.2924	49.8132	0.0002	0.0076	0.4072	91.4601
14T45	0.01025	0.01475	41.6638	0.0185	0.035	0.12175	8.8015	49.2365	0	0.008	0.42225	90.8875
14T46A	0.00725	0.01225	41.63	0.0045	0.0455	0.1195	8.473	49.5665	0.00625	0.01075	0.4015	91.2503
14T46B	0.0114	0.0154	41.8242	0.0066	0.0152	0.134	8.7646	49.5556	0.0014	0.004	0.4154	90.9748
14T47A	0.0008	0.0108	41.8946	0.0094	0.0754	0.1642	8.5898	49.7898	0.0036	0.0052	0.3778	91.1774
14T47B	0.0074	0.0053	41.5073	0.0138	0.0379	0.1156	8.2794	49.3665	0.0058	0.004	0.416	91.4023

## Sheet: Opx-Avg
Sample	Na2O	Al2O3	SiO2	K2O	CaO	MnO	FeO	MgO	TiO2	Cr2O3	NiO	Mg#
14T08B	0.015375	2.46837	56.1423	0.000875	0.88075	0.16175	6.05087	33.7209	0.069875	0.6855	0.103625	90.8553
14T09B	0.0066	1.6212	56.6714	0.0043	0.8595	0.1749	6.2165	34.0917	0.0557	0.5128	0.0572	90.7215
14T10B	0.00815385	2.03577	56.2532	0.002	0.844154	0.159308	6.75377	33.461	0.221615	0.581077	0.0866154	89.8303
14T11D	0.19	3.345	52.425	0.01	22.51	0.13	2.82	17.14	0.24	0.94	0.03	91.5514
14T11E	0.159	2.207	52.915	0.004	22.745	0.104	2.708	17.577	0.12	0.926	0.042	92.0528
14T11F	0.11	1.3	53.02	0	23.85	0.08	2.59	17.27	0.11	0.55	0.02	92.2409
14T15B	0.0118333	1.046	57.4527	0	0.701667	0.120167	6.27217	34.1043	0.0918333	0.439667	0.0836667	90.648
14T16B	0.017	2.325	56.7424	0.0128	0.7862	0.1458	6.0254	33.3056	0.056	0.623	0.0802	90.7878
14T17	0.008	2.24357	56.8029	0.00285714	0.663143	0.139286	5.868	33.6504	0.0747143	0.653857	0.0861429	91.0904
14T20B	0.0134	2.986	56.315	0.0174	0.6148	0.1302	5.9546	32.898	0.0598	0.628	0.0978	90.7832
14T21B	0.0114545	2.23255	57.0736	0.005	0.948	0.140545	5.80018	33.6975	0.0527273	0.653636	0.0906364	91.1961
14T23B	0.0106667	2.43317	56.6583	0	1.03883	0.180333	6.22383	33.1683	0.0773333	0.615167	0.101167	90.4791
14T24B	0.009	2.541	56.117	0.004	1.604	0.161333	5.842	33.0217	0.0623333	0.685667	0.081	90.9732
14T25A	0.005	2.084	56.5715	0	0.814	0.161	6.0435	33.877	0.15	0.525	0.086	90.9045
14T25B	0.0176667	3.01233	55.9003	0	2.13433	0.112	5.841	32.5497	0.171333	0.782667	0.105	90.8571
14T26	0.016	2.658	56.6155	0.0125	2.6135	0.137	5.4285	32.1185	0.0895	0.804	0.0825	91.3441
14T27B	0.0288	1.9658	57.3166	0.0088	1.2142	0.1466	5.552	33.9758	0.0408	0.6468	0.117	91.6031
14T28B	0.00614286	3.04829	56.004	0.0148571	0.752	0.107571	5.86557	33.2996	0.114571	0.799714	0.0888571	91.0088
14T31B	0.0074	1.9696	56.7164	0.0012	1.8156	0.1374	5.6996	33.316	0.0618	0.5644	0.08	91.2608
14T32A	0.0138	1.6038	57.9364	0.0106667	0.723	0.1658	5.8674	34.0319	0.0476	0.616533	0.0798	91.1804
14T32B	0.00416667	2.23617	57.3452	0.00666667	1.03033	0.1425	5.67417	33.6945	0.0773333	0.628833	0.0948333	91.3705
14T42B	0.014	1.73362	57.6246	0.010125	0.7055	0.12375	5.51375	33.6546	0.031	0.574375	0.071625	91.5843
14T43A	0.0143333	1.65	58.1567	0.0193333	0.869667	0.121	5.62733	34.0873	0.021	0.508	0.076	91.5256
14T43B	0.0042	2.6706	57.2456	0.0092	0.6258	0.139	5.6856	33.7708	0.0312	0.6954	0.1156	91.3711
14T44B	0.00575	2.36163	57.2343	0.005375	0.79725	0.130375	5.54188	33.7825	0.03425	0.729375	0.095625	91.5737
14T46A	0.0035	1.5405	57.9945	0.011	0.594	0.1665	5.542	34.3615	0.0205	0.6355	0.108	91.704
14T46B	0.0103333	2.39633	57.3233	0	0.621333	0.146	5.68033	33.7353	0.0176667	0.736	0.112	91.3707
14T47B	0.0153571	2.46707	56.7859	0.00364286	1.10257	0.136857	5.36407	33.2733	0.0307857	0.703429	0.0903571	91.7076

## Sheet: Cpx-Avg
Sample	Na2O	Al2O3	SiO2	K2O	CaO	MnO	FeO	MgO	TiO2	Cr2O3	NiO	Mg#
14T02A	0.253333	2.94667	53.0033	0.00333333	24.43	0.0566667	2.19333	16.6933	0.233333	0.99	0.03	93.1356
14T08A	0.375	2.88	53.545	0	23.105	0.045	2.12	16.95	0.19	1.125	0.05	93.4487
14T08B	0.250688	3.21088	52.0528	0.0025625	23.2531	0.079125	2.48819	16.8027	0.190313	1.10137	0.0614375	92.3328
14T09A	0.252222	1.41778	54.6033	0.00444444	24.6233	0.0711111	1.66222	17.5067	0.134444	0.622222	0.0411111	94.9282
14T09B	0.3	2.354	52.7685	0.00375	23.439	0.10325	2.29875	17.0027	0.1625	1.05425	0.034	92.9507
14T10B	0.3782	3.3528	52.1086	0	23.1942	0.0908	2.4492	16.6227	0.6222	1.2222	0.0491	92.3694
14T10C	0.197368	3.47895	51.6858	0.00578947	23.0158	0.0857895	2.64632	16.7847	0.199474	1.12316	0.0473684	91.8829
14T11D	0.19	3.345	52.425	0.01	22.51	0.13	2.82	17.14	0.24	0.94	0.03	91.5514
14T11E	0.159	2.207	52.915	0.004	22.745	0.104	2.708	17.577	0.12	0.926	0.042	92.0528
14T11F	0.11	1.3	53.02	0	23.85	0.08	2.59	17.27	0.11	0.55	0.02	92.2409
14T13	0.2634	2.0112	53.868	0.004	24.9538	0.0408	1.9032	16.7096	0.142	0.8796	0.0404	93.9921
14T16A	0.2994	2.8554	53.2592	0.0058	23.1718	0.0918	2.535	17.4636	0.197	0.955	0.0444	92.47
14T16B	0.199333	2.868	53.1618	0.01	23.574	0.0791667	2.35167	16.8757	0.1665	0.909167	0.038	92.7511
14T17	0.4528	3.6032	52.556	0.0004	23.3314	0.0816	2.172	16.2438	0.2894	1.3128	0.0464	93.0232
14T18	0.264333	2.753	52.5313	0.0186667	24.92	0.0416667	2.08967	16.5597	0.187667	1.03767	0.0166667	93.3907
14T20B	0.17775	3.58638	52.1646	0.0015	23.7777	0.087	2.36413	16.255	0.220375	1.26625	0.2435	92.4676
14T21B	0.214	2.953	52.8795	0.0185	23.93	0.0745	2.1775	16.9075	0.1985	1.1695	0.026	93.263
14T23B	0.159	2.73411	53.0939	0.00196296	23.0249	0.101963	2.56759	17.4678	0.162889	0.858111	0.0428889	92.4397
14T24B	0.173667	2.88433	52.321	0.005	23.711	0.067	2.32967	17.4023	0.173333	0.938	0.0386667	93.0187
14T25A	0.1815	1.9935	53.265	0	24.929	0.0625	1.848	16.7475	0.154	0.786	0.0135	94.1571
14T25B	0.1954	3.2432	52.6194	0.001	23.8676	0.1	2.254	16.4704	0.2608	1.0034	0.0646	92.8748
14T26	0.263875	3.05525	53.318	0.00575	23.2153	0.0745	2.21687	17.0358	0.198375	1.14725	0.04075	93.2162
14T27B	0.330333	2.53267	53.498	0.0143333	24.153	0.0843333	1.97867	17.036	0.155667	1.16	0.0673333	93.8832
14T28B	0.212667	3.74033	52.4003	0	23.6423	0.0906667	2.13333	16.2573	0.295333	1.36667	0.0676667	93.1444
14T31B	0.130909	1.75955	53.8045	0.00218182	24.5809	0.0577273	1.76782	17.4135	0.208364	0.774182	0.0540909	94.6122
14T32B	0.1925	2.532	53.5245	0.0045	24.2415	0.0545	2.0175	16.9165	0.2045	1.1265	0.0265	93.7288
14T42B	0.376	2.067	54.187	0	23.473	0.018	2.089	16.915	0.055	1.071	0.016	93.5218
14T43B	0.3005	3.3695	53.5695	0.0025	21.888	0.0815	2.528	17.352	0.084	1.2	0.053	92.4465
14T46B	0.172	1.972	53.893	0.03	24.164	0.069	1.911	17.175	0.037	0.955	0.035	94.1258
14T47B	0.45025	2.97525	53.943	0.013	23.4247	0.0725	2.06275	16.5575	0.06475	1.182	0.041	93.4708

## Sheet: Inclusions representative anal.
Sample	Na2O	Al2O3	SiO2	K2O	CaO	MnO	FeO	MgO	TiO2	Cr2O3	NiO	F	Cl	BaO	Total
14T09B-Micas	0.252	15.504	38.928	7.077	0.071	0.081	2.473	23.24	1.813	2.023	0.127	0	0.015	0.012	91.616
14T11E-Micas	3.21	14.38	39.32	0.27	0.02	0.03	3.15	29.45	0.54	2.65	0.17	0.4	0.09	0	93.67
14T11D-Amphibole	2.07	10.06	46.46	0	11.77	0.1	3.41	19.67	1.05	2.11	0.08	0.05	0.03	0	96.84
14T11E-Amphibole	2.89	11.08	45.58	0	11.5	0.17	3.59	19.12	0.86	2.65	0.03	0	0.04	0	97.51
14T40-Clinopyroxene	0.364	0.694	53.94	0	24.571	0.056	1.853	17.079	0.14	1.517	0.085	0.026	0.008	0	100.333
14T42A-Clinopyroxene	0.342	0.749	53.827	0	24.888	0	1.889	16.425	0.028	1.783	0.014	0	0	0	99.945
14T16A-Orthopyroxene	0.037	1.662	56.258	0.025	0.959	0.113	5.51	33.681	0.04	1.143	0.106	0.066	0.001	0	99.601
14T46B-Orthopyroxene	0.018	1.386	56.125	0.007	0.525	0.108	5.934	34.737	0	1.062	0.12	0.087	0	0	100.109
14T27B-Olivine	0	0.01	41.35	0	0.04	0.11	7.54	50.92	0.01	0.11	0.34	0	0.02	0	100.45
14T42A-Olivine	0.006	0	41.715	0.018	0.062	0.093	4.732	52.309	0	1.094	0.371	0.062	0.012	0.018	100.492
14T12-Chlorite	0.105	18.216	29.712	0.02	0.305	0.003	8.191	27.486	0.093	2.48	0.369	0.252	0.011	0	87.241
14T14-Chlorite	0.086	22.51	28.561	0	0.152	0	1.27	29.64	0.032	2.786	0.163	0	0.007	0	85.205

## Sheet: G50083
Ceuleneer, G., et al., 2022, A Rosetta stone linking melt trajectories in the mantle to the stress field and lithological heterogeneities (Trinity ophiolite, California): Geology, v. 50, https://doi.org/10.1130/G50083.1
